# Supplementary material for: Low-Intensity Exercise in Mice Is Sufficient to Protect Retinal Function During Light-Induced Retinal Degeneration
Source: PubMed Central journal article supplement — Invest Ophthalmol Vis Sci. 2019 Apr;60(5):1328–35. doi: 10.1167/iovs.18-25883 (PMC6445616; doi:10.1167/iovs.18-25883), 2019-04
Supplement: iovs-60-04-13_s01.pdf [file iovs-60-04-13_s01.pdf]

## Low-intensity exercise protects retinal function, Mees et al.

### Supplementary Information

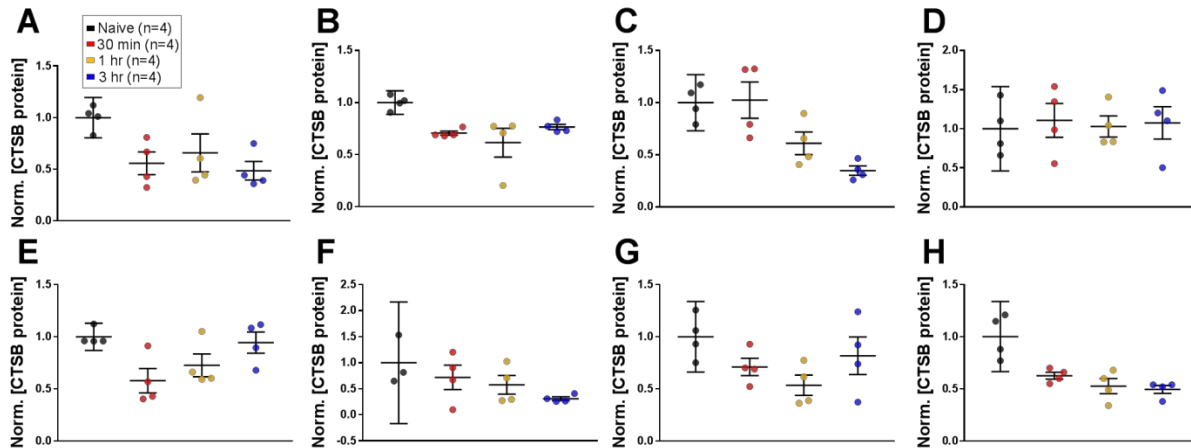

### Supplementary Figure 1. CTSB protein levels did not increase at any timepoint in any tissue following medium intensity exercise.

CTSB levels were measured in BALB/c mice after 1 week (A-D) and 3 weeks (E-H) of exercise (10 m/min) in calf muscle (A, E), serum (B, F), brain (C, G) and retina (D, H) at 30 minutes, 1 hour, and 3 hours following the last exercise session. Data are depicted as mean  $\pm$  s.e.m. and normalized to inactive+LIRD. Circles represent measurements for individual animals.

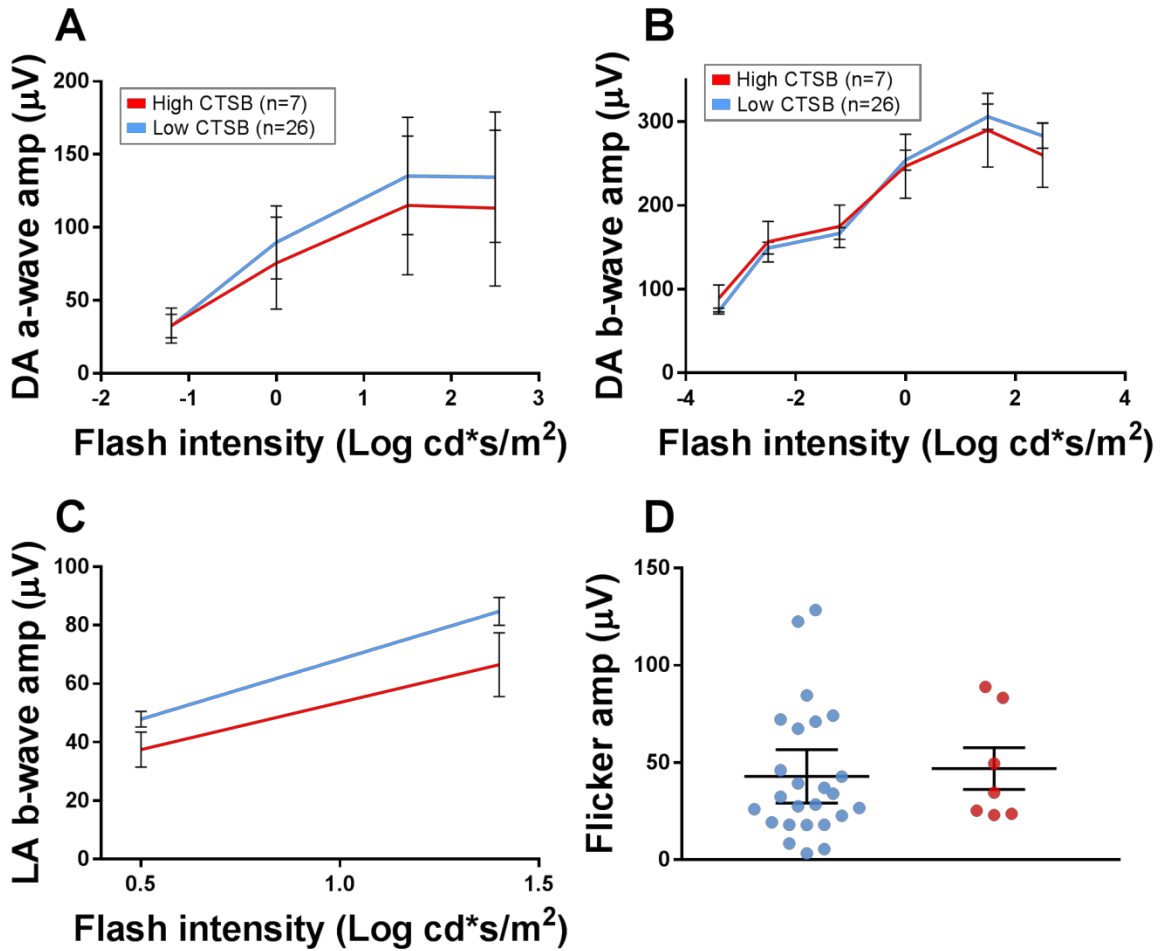

**Supplementary Figure 2. Calf muscle CTSB protein levels do not correlate with retinal function**

Active animals of any exercise intensity were grouped based on CTSB level. Animals with a calf muscle CTSB level 10% higher than the max inactive+LIRD animal were classified as “high CTSB” and compared to those below the threshold, “low CTSB”. None of the ERG parameters of scotopic a-wave (A), scotopic b-wave (B), photopic b-wave (C) or flicker (D) showed any difference in amplitude between the two groups. Data are depicted as mean  $\pm$  s.e.m. Circles represent measurements for individual animals.
